# Supplementary material for: Coaxial technique-promoted diagnostic accuracy of CT-guided percutaneous cutting needle biopsy for small and deep lung lesions
Source: PLoS One. 2018 Feb 15;13(2):e0192920. doi: 10.1371/journal.pone.0192920 (PMC5814003; doi:10.1371/journal.pone.0192920)
Supplement: S2 Table — (XLSX) [file pone.0192920.s002.xlsx]

## Sheet: Sheet1
No.	Sex	Location	Long diameter	Short diameter（cm）	depth(cm)	Necrosis or cavitation	Pneumothorax	Chest tube	Haemoptysis	Chest pain	Patient position	Pathology
1	M	RUL	11	7	2.9						supine	Lung adenocarcinoma
2	M	LUL	11.6	5.6	2.4						supine	Lung adenocarcinoma
3	M	RUL	6.1	4.5	3.4						supine	Lung adenocarcinoma
4	F	RML	5.6	3.3	1.6						supine	SCLC
5	F	RLL	7.6	6	2.3				1		supine	NSCLC
6	M	LUL	7.4	3.6	3.4						supine	SCLC
7	F	LLL	3.5	3.3	3.2		1			1	prone	Metastasis
8	M	RUL	5.2	3	2						supine	Lung adenocarcinoma
9	M	RLL	1.7	1.6	3						prone	Lung adenocarcinoma
10	M	RUL	5.7	4.4	5.5		1	1			left lateral	Lung squamous cell carcinoma
11	M	RLL	4.1	3	3.6						prone	Lung adenocarcinoma
12	M	RUL	6.3	5.1	3.3						supine	Lung adenocarcinoma
13	M	RLL	2.2	1.6	3.5						prone	Tuberculosis
14	M	RUL	6.8	6.1	2.6	1					supine	Lung squamous cell carcinoma
15	F	LLL	2.5	2.4	2.9		1				prone	Chronic inflammation
16	M	RLL	4.4	3.3	3.4				1		prone	Metastasis
17	F	LLL	8	7	3.6						prone	Lung squamous cell carcinoma
18	F	LLL	7.6	5.5	1.3						supine	SCLC
19	M	LUL	8.4	6.6	3	1					supine	Lung squamous cell carcinoma
20	F	RML	2	1.4	2.8						prone	Lung squamous cell carcinoma
21	M	RUL	3	2.1	3.3						supine	Granuloma
22	M	RUL	2	1	4.3				1		prone	Tuberculosis
23	F	RLL	5.9	4.4	2.2						prone	Lung squamous cell carcinoma
24	M	LUL	7.9	3.7	2.2						supine	Lung squamous cell carcinoma
25	M	LLL	9.1	6.6	6.5		1	1			supine	Lung adenocarcinoma
26	F	LLL	5.7	4.1	3.5		1				prone	Lung squamous cell carcinoma
27	M	RLL	2.5	1.3	4.2	1					prone	NSCLC
28	M	LLL	4.5	4.1	3				1		prone	NSCLC
29	F	LLL	4.3	2.1	2.2						prone	Metastasis
30	F	LUL	4.1	4.1	6						supine	Lung adenocarcinoma
31	M	LLL	6	4.9	2.4						prone	Lung adenocarcinoma
32	M	RML	4.9	1.9	2.9	1	1	1			supine	Lung squamous cell carcinoma
33	F	LLL	7.3	2.4	2.4						prone	SCLC
34	M	RML	5.4	5	3.6					1	supine	Lung squamous cell carcinoma
35	M	RLL	8.9	4.9	2.6						prone	SCLC
36	F	LLL	4.2	1.8	3.1						prone	Infection
37	F	LUL	2.1	1.4	3.9		1				supine	Granuloma，proved to be metastasis by follow-up
38	F	RLL	6.7	6.5	2.6						prone	Lung adenocarcinoma
39	M	LUL	3.4	2.5	2.8						supine	Granuloma，proved to be metastasis by follow-up
40	F	LLL	2.8	1.8	3.7						prone	Fungus infection
41	M	LUL	7.4	3.9	3						supine	Lung adenocarcinoma
42	M	LUL	4.7	3	5						prone	Metastasis
43	F	LLL	5.1	4.1	3.7				1		right lateral	Metastasis
44	F	LLL	3	2.2	3.5						prone	Lung adenocarcinoma
45	M	RLL	3.9	2.3	3.4		1				prone	Lung adenocarcinoma
46	M	RUL	4.4	4.3	1.3						supine	Lung adenocarcinoma
47	M	LUL	3.8	2.5	1.8						supine	Lung squamous cell carcinoma
48	F	RUL	5.4	1.7	5.9		1				supine	Lung adenocarcinoma
49	M	LUL	8.3	6.5	2.9						supine	SCLC
50	F	RLL	3.6	2.8	3.4						prone	NSCLC
51	M	LUL	11.7	6.8	2.7						supine	Lung squamous cell carcinoma
52	M	LUL	5	2	2.5				1		supine	Lung adenocarcinoma
53	F	RML	1.6	1.4	3.3						prone	Lung adenocarcinoma
54	F	LUL	2.7	1.7	3.4					1	prone	NSCLC
55	M	RUL	10.8	7.8	4						supine	SCLC
56	M	RLL	2.8	2.5	3		1				supine	Lung squamous cell carcinoma
57	M	LLL	7.3	4.3	3.4						supine	Metastasis
58	M	RLL	4	2.7	3.7				1		prone	Metastasis
59	F	LLL	3.8	3.5	3.8						supine	Abscess
60	M	RLL	2.9	2.7	3.5						prone	Lung adenocarcinoma
61	M	LLL	9.4	4.3	2.2						prone	Lung squamous cell carcinoma
62	F	RUL	2.3	2	3.5						prone	NSCLC
63	M	LUL	9.4	6.4	1.3						supine	Lung squamous cell carcinoma
64	M	LLL	5.6	4.4	4.1						prone	Infection
65	M	LLL	1.2	1.2	3						prone	NSCLC
66	M	RUL	2.8	2.2	2						supine	Nondiagnostic
67	M	RML	3.7	2.5	2.8						prone	Granuloma
68	M	LUL	6.7	5.1	2						supine	SCLC
69	F	RLL	3.7	1.6	4.1						prone	Lung squamous cell carcinoma
70	M	RLL	5.1	2.4	2						prone	Lung adenocarcinoma
71	M	RLL	1.4	1	3						prone	Lung squamous cell carcinoma
72	M	RLL	5.8	5.3	3.4	1					prone	Lung squamous cell carcinoma
73	M	RLL	5.2	3.8	4.3		1		1		prone	SCLC
74	M	LUL	4.5	3	4.2						supine	Lung adenocarcinoma
75	M	LLL	1.4	1.3	3.8						supine	Metastasis
76	M	RML	1.4	1.3	4.1						supine	Chronic inflammation
77	F	RLL	4.7	4.2	2.4						prone	Abscess
78	M	LUL	1.1	1.1	1.8						right lateral	Lung squamous cell carcinoma
79	M	RUL	1.4	1.2	4.3		1				prone	Lung adenocarcinoma
80	M	RLL	1.2	1.1	3						supine	Granuloma，proved to be metastasis by follow-up
81	M	RUL	7.3	5.6	4.3	1					supine	Lung adenocarcinoma
82	M	RUL	5.5	4.8	2.2						prone	Lung adenocarcinoma
83	F	LLL	7.3	6.5	3.1	1				1	supine	Lung squamous cell carcinoma
84	M	RLL	1.3	1	4						supine	Lung adenocarcinoma
85	M	RML	6.2	4.8	2.4				1		prone	Lung adenocarcinoma
86	M	RUL	4.7	4	2.6						prone	Lung adenocarcinoma
87	M	RLL	1.4	1.2	4.3		1				supine	Lung adenocarcinoma
88	F	LLL	1.3	1.3	3.7						supine	SCLC
89	M	LUL	5.8	5	4.2						supine	Metastasis
90	M	RML	6	5.6	2.8						prone	Lung adenocarcinoma
91	F	RLL	5.5	4.8	4.1						supine	Lung squamous cell carcinoma
92	M	RLL	6.3	4.5	3.1						supine	NSCLC
93	M	RUL	4.9	3.6	3.8		1				prone	Metastasis
94	M	LLL	5.8	3.9	2.5				1		prone	Lung squamous cell carcinoma
95	F	LLL	4.8	3.8	2.9					1	prone	Lung squamous cell carcinoma
96	M	RUL	7	5.5	4.7	1					supine	Lung adenocarcinoma
97	M	RML	6.4	5.3	2.7						supine	Pulmonary atelectasis
98	M	LUL	6.6	5.8	3.1						supine	Lung adenocarcinoma
99	F	RLL	5.8	4.7	2.5	1					supine	Metastasis
100	F	RUL	5.3	3.5	4						supine	Infection
101	M	LLL	5.5	3.5	4.3		1			1	supine	Chronic inflammation
102	M	RUL	7.2	5	2.3						prone	NSCLC
103	M	RML	5.7	4.5	4						prone	Lung squamous cell carcinoma
104	M	LUL	6.5	3.8	4.1						supine	NSCLC
105	M	RUL	5.5	3.7	2.7		1				prone	Infection
106	M	RLL	6.8	5.4	4.5				1		supine	Lung squamous cell carcinoma
107	M	LLL	4.7	3	3.2						supine	Lung adenocarcinoma
108	M	RUL	7.4	5.7	3.9						supine	Lung adenocarcinoma
109	M	RML	4.4	3.8	2.6						prone	NSCLC
110	F	LUL	5.7	4.1	2.5						supine	Metastasis
111	M	LLL	1.3	1.3	4.4						supine	Lung adenocarcinoma
112	M	RML	1.1	1.1	2.9						prone	SCLC
113	F	RUL	6.4	4.8	5.2						supine	Lung adenocarcinoma
114	F	LLL	1.3	1.3	4		1				supine	Nondiagnostic
115	M	RUL	5.6	5	4						supine	Lung adenocarcinoma
116	M	LUL	1.2	1.1	2.8						prone	Lung adenocarcinoma
117	M	RML	5.3	4.4	2.5						supine	Metastasis
118	M	LLL	1.2	1.2	3.7						supine	NSCLC
119	M	RML	7.7	6	1.7					1	prone	Lung squamous cell carcinoma
120	M	LLL	1.4	1.2	2.1		1				prone	Lung squamous cell carcinoma
121	F	LUL	4.8	3.9	4.3				1		prone	Lung squamous cell carcinoma
122	M	LUL	7.2	5.6	5.4		1				supine	SCLC
123	M	RUL	7.8	5	3.9	1					supine	SCLC
124	M	LLL	5.4	3.3	4.8						prone	Fungus infection
125	M	RML	1.4	1.3	4.1						supine	Granuloma，proved to be metastasis by follow-up
126	F	RLL	6.5	5.2	4.1						supine	Lung squamous cell carcinoma
127	M	RLL	4.3	2.8	2.1						prone	Lung adenocarcinoma
128	M	LLL	7.7	4.6	1.4						supine	Metastasis
129	M	RUL	1.3	1.3	3.5						supine	Metastasis
130	M	RUL	5.5	3.3	3.2		1		1		prone	Lung adenocarcinoma
131	F	RLL	4.8	4.5	4.7						prone	SCLC
132	M	RLL	6.4	4.4	3.5						supine	Lung adenocarcinoma
133	M	RML	5.7	3.9	2.4						left lateral	Lung adenocarcinoma
134	F	LLL	1.4	1.3	4.3					1	supine	SCLC
135	M	RUL	2.9	2.5	4.5	1					prone	Tuberculosis
136	M	LUL	5.3	3.5	2.5		1				prone	Lung adenocarcinoma
137	M	RUL	6.2	3.7	1.5						supine	Lung adenocarcinoma
138	F	LUL	1	1	4.3		1				prone	Chronic inflammation，proved to be lung adenocarcinoma by resection
139	F	LLL	5.9	4.5	4						prone	NSCLC
140	M	RLL	1.1	1	2.3						supine	Lung adenocarcinoma
141	M	RUL	4.7	3	2.8						supine	Metastasis
142	M	RLL	5.1	3.5	4.6				1		supine	Lung squamous cell carcinoma
143	F	RUL	1.3	1.3	4.2					1	prone	Lung squamous cell carcinoma
144	M	LLL	5.9	4.5	4.1		1				prone	Lung squamous cell carcinoma
145	M	RML	6.6	4.4	2.7						supine	Metastasis
146	M	RLL	5.6	3.6	3.9	1					prone	NSCLC
147	M	LUL	1.2	1.2	4.5		1	1			supine	Metastasis
148	F	RUL	5.3	3.9	4.2						prone	Infection
149	M	LLL	4.8	2.8	3.1				1		right lateral	Lung adenocarcinoma
150	M	RUL	7.6	4.7	2.5		1				prone	NSCLC
151	F	LLL	8	4.8	2.7						prone	Lung squamous cell carcinoma
152	M	RLL	6.3	5	2.6						prone	Lung adenocarcinoma
153	M	LLL	1.1	1.1	3.6					1	supine	Lung adenocarcinoma
154	M	RML	4.9	3.4	2.1						supine	SCLC
155	M	LUL	5.9	4.2	1.8						supine	Lung adenocarcinoma
156	M	LUL	7.5	4.9	2.6		1				supine	Lung adenocarcinoma
157	M	RLL	6.8	4.2	2.4				1		supine	Lung adenocarcinoma
158	M	RLL	4.6	2.7	3		1				supine	Metastasis
159	M	RUL	7	5.5	2.2						prone	Lung adenocarcinoma
160	M	RML	6.9	5.3	3.1	1					prone	Lung squamous cell carcinoma
161	F	RUL	1.4	1.3	4.3						supine	Lung adenocarcinoma
162	M	LLL	8.2	5	2.7					1	supine	Metastasis
163	F	RUL	1.3	1.3	1.7						prone	Lung squamous cell carcinoma
164	M	RLL	8	4.3	3.2						prone	SCLC
165	M	RUL	6.6	4.3	2.8		1	1			supine	Lung adenocarcinoma
166	M	RML	5.8	4	4.1				1		supine	SCLC
167	F	LUL	4.7	3.6	4.2						prone	Metastasis
168	M	LUL	1	1	3.5						prone	Metastasis
169	F	RUL	5.4	3.6	2.3						supine	Lung squamous cell carcinoma
170	F	RUL	1.2	1.2	4.5						prone	Lung adenocarcinoma
171	M	LLL	7.5	4.7	2.1	1					prone	Lung squamous cell carcinoma
172	F	RML	5.7	4.2	2.4						supine	Lung adenocarcinoma
173	M	LUL	7.6	4.8	2.6						prone	Lung squamous cell carcinoma
174	M	LLL	6	3.5	4.6						prone	Lung squamous cell carcinoma
175	M	RUL	1.3	1.1	3.6				1		prone	NSCLC
176	M	RLL	1.4	1.2	3.2						supine	Lung squamous cell carcinoma
177	M	LLL	6.7	4.4	4.2		1				supine	Metastasis
178	M	RML	4.6	3	2.9	1				1	prone	Abscess
179	M	RLL	7.8	5	3.1						prone	Lung squamous cell carcinoma
180	M	RUL	7.3	5.7	2.8	1	1				supine	Lung squamous cell carcinoma
181	F	LUL	1.2	1.2	4.6						supine	Nondiagnostic
182	F	LLL	4.3	2.5	5.1						right lateral	Abscess
183	F	RML	1.4	1.2	4.3		1				prone	Nondiagnostic
184	M	RLL	1.2	1.2	1.7				1		prone	Lung adenocarcinoma
185	M	RLL	1.2	1.1	3.3						prone	Lung adenocarcinoma
186	M	RLL	5.4	3.7	2.7						supine	NSCLC
187	F	RUL	6.6	4.9	3.1						prone	Metastasis
188	M	LUL	5.8	2.8	4.1						supine	Lung squamous cell carcinoma
189	F	RML	5	3.5	3.9	1			1	1	supine	Abscess
190	F	RLL	4.9	2.5	2.9		1				prone	Nondiagnostic
191	M	RUL	1	1	5						prone	Lung adenocarcinoma
192	M	LLL	7.8	5.5	2.6						prone	NSCLC
193	M	LLL	6.4	4.5	2.6						supine	Lung squamous cell carcinoma
194	M	RML	5.2	3.5	3.1		1				supine	Lung squamous cell carcinoma
195	M	RUL	1.4	1.3	1.7						prone	NSCLC
196	M	RUL	6.7	3.8	4.2					1	left lateral	Lung adenocarcinoma
197	M	LUL	5	2.4	4.7						prone	Lung squamous cell carcinoma
198	F	RUL	8.2	6.6	4.6						supine	Metastasis
199	M	LUL	1.2	1.2	5.2						supine	Granuloma
200	M	RLL	7.8	5.3	1.5						prone	Lung squamous cell carcinoma
201	F	RML	6.8	5.1	2.5				1		left lateral	Lung adenocarcinoma
202	M	LLL	7	4.8	2.1						prone	Lung adenocarcinoma
203	M	LUL	6.4	4.5	1.3		1	1			supine	Lung adenocarcinoma
204	F	RUL	8.1	6.7	2.3	1					supine	Lung squamous cell carcinoma
205	M	RUL	5.1	3.3	6				1	1	prone	Lung squamous cell carcinoma
206	F	LLL	6.5	4.3	4.3						prone	Lung adenocarcinoma
207	M	LLL	10.2	7.5	2						prone	Lung squamous cell carcinoma
208	M	LUL	7.8	4.8	2.8						supine	NSCLC
209	M	RLL	5.6	3.7	2.5						prone	SCLC
210	M	RUL	6.3	4.3	4.1						supine	Lung squamous cell carcinoma
211	M	RML	4.2	2.3	5.9		1				prone	Chronic inflammation
212	M	RUL	1.4	1.3	3.6						supine	SCLC
213	F	RUL	7.3	5.5	2.7				1		supine	Metastasis
214	M	LLL	4.9	2.3	3						prone	Metastasis
215	M	LLL	6.5	4	2.7						prone	Lung adenocarcinoma
216	F	RUL	6.3	4.8	2.6				1	1	supine	Lung adenocarcinoma
217	F	RUL	5.4	4.9	3.1						prone	NSCLC
218	M	LUL	1	1	4.5						prone	Lung squamous cell carcinoma
219	M	RML	1.2	1.2	2.4						supine	NSCLC
220	F	LLL	6.8	4.6	4.5		1	1			supine	Lung squamous cell carcinoma
221	M	LUL	7.4	5	3.4						supine	Lung squamous cell carcinoma
222	M	RUL	6.7	3.3	2.1						supine	Metastasis
223	M	LUL	5.9	4.6	3.1					1	prone	Metastasis
224	M	RLL	7.1	5.7	2.8						prone	NSCLC
225	F	LLL	1.4	1.3	4.2				1		supine	Lung squamous cell carcinoma
226	M	RUL	8.3	5.7	4.3						supine	Lung adenocarcinoma
227	F	RLL	7.6	5.5	2.3						supine	Lung adenocarcinoma
228	F	RML	6.4	4.8	2.7						prone	Metastasis
229	M	LUL	7.9	5	2.1						prone	Metastasis
230	M	LUL	5	3.2	1.8						supine	Lung adenocarcinoma
231	F	RLL	6.8	4.3	4.2		1				prone	Metastasis
232	M	RML	7.4	5.9	2.8						supine	SCLC
233	M	RUL	6.5	4.7	1.7						prone	Lung adenocarcinoma
234	M	LLL	6	3.6	2.7				1		prone	NSCLC
235	M	LUL	6.7	4.3	2.5					1	supine	Lung adenocarcinoma
236	M	LLL	5.8	3.8	2.6						prone	SCLC
237	M	RUL	8.1	6.2	2						supine	Lung adenocarcinoma
238	M	RLL	6.7	5.1	2.3						supine	Metastasis
239	F	RUL	7.7	5.4	1.7						supine	SCLC
240	F	RML	6.5	4.7	2.2						supine	Lung squamous cell carcinoma
241	M	LUL	7	4.6	2						supine	Lung adenocarcinoma
242	M	RLL	5.2	3.7	3		1				supine	Lung squamous cell carcinoma
243	M	LLL	7.2	5.8	3.2						prone	Lung squamous cell carcinoma
244	M	RUL	1.4	1.2	4.3					1	left lateral	NSCLC
245	M	RML	7.8	4.8	3.2						supine	Lung adenocarcinoma
246	F	LLL	1.3	1.1	1.9		1	1			supine	Metastasis
247	M	RUL	8	5.7	2.6						supine	Lung squamous cell carcinoma
248	M	RML	1.4	1.3	2.4						supine	Tuberculosis
249	M	RUL	7.9	6	1.9					1	supine	Lung squamous cell carcinoma
250	F	RUL	10	6.4	2	1			1		supine	Lung squamous cell carcinoma
251	F	LUL	1.2	1.2	3.1						prone	Lung adenocarcinoma
252	M	RML	7.6	6.2	2.1		1				prone	Lung squamous cell carcinoma
253	M	LLL	6.8	6.3	4.3						prone	Lung squamous cell carcinoma
254	M	RLL	5.9	3.5	2.3					1	supine	Lung squamous cell carcinoma
255	F	RLL	5.6	4	2.7						prone	Metastasis
256	M	LUL	9	5.8	1.7		1		1		prone	NSCLC
257	M	RUL	7.8	6	4.6						supine	Lung squamous cell carcinoma
258	M	RML	5.9	4.6	1.9						prone	Metastasis
259	F	LLL	8.5	5	3.1						right lateral	SCLC
260	M	LUL	12	8.3	2.4						prone	Lung squamous cell carcinoma
261	M	RUL	1.2	1.1	4		1				prone	SCLC
262	F	LUL	9.5	7.7	3.2						supine	Lung squamous cell carcinoma
263	M	RML	10.7	8	3						supine	NSCLC
264	M	RLL	1.3	1.3	4.5		1				supine	Fibrosis，proved to be metastasis by follow-up
265	M	LLL	7.8	6.2	2.8				1		prone	Lung adenocarcinoma
266	F	RML	9	6.9	2.7						left lateral	Lung squamous cell carcinoma
267	M	LUL	10.5	7	2.3						supine	Lung adenocarcinoma
268	M	RLL	1.3	1.2	2.3						supine	Lung adenocarcinoma
